# Supplementary material for: Increased Invasion Risk of Tagetes minuta L. in China under Climate Change: A Study of the Potential Geographical Distributions
Source: MDPI journal article supplement (doi:10.3390/plants11233248), 2022-11-26
Supplement: s1 [file s1]

## Supplementary material

| Variable | Description                             | In the model (YES/NO) | Unit     |
|----------|-----------------------------------------|-----------------------|----------|
| Bio1     | Annual mean temperature                 | NO                    | °C       |
| Bio2     | Mean diurnal range                      | YES                   | °C       |
| Bio3     | Isothermality                           | YES                   | -        |
| Bio4     | Temperature seasonality                 | NO                    | °C       |
| Bio5     | Max temperature of the warmest month    | NO                    | °C       |
| Bio6     | Min temperature of the coldest month    | NO                    | °C       |
| Bio7     | Temperature annual range                | NO                    | °C       |
| Bio8     | Mean temperature of the wettest quarter | YES                   | °C       |
| Bio9     | Mean temperature of the driest quarter  | NO                    | °C       |
| Bio10    | Mean temperature of the warmest quarter | NO                    | °C       |
| Bio11    | Mean temperature of the coldest quarter | NO                    | °C       |
| Bio12    | Annual precipitation                    | YES                   | mm       |
| Bio13    | Precipitation of the wettest month      | NO                    | mm       |
| Bio14    | Precipitation of the driest month       | NO                    | mm       |
| Bio15    | Precipitation seasonality               | YES                   | -        |
| Bio16    | Precipitation of the wettest quarter    | NO                    | mm       |
| Bio17    | Precipitation of the driest quarter     | YES                   | mm       |
| Bio18    | Precipitation of the warmest quarter    | YES                   | mm       |
| Bio19    | Precipitation of the coldest quarter    | YES                   | mm       |
| Altitude | Altitude                                | YES                   | m        |
| T_Gravel | Topsoil gravel content                  | YES                   | %vol.    |
| T_Sand   | Topsoil sand fraction                   | YES                   | %wt.     |
| T_Silt   | Topsoil silt fraction                   | NO                    | %wt.     |
| T_Clay   | Topsoil clay fraction                   | YES                   | %wt.     |
| T_OC     | Topsoil organic carbon                  | YES                   | % weight |
| T_pH_H2O | Topsoil pH(H2O)                         | NO                    | -        |
| T_BS     | Topsoil base saturation                 | YES                   | %        |
| T_TEB    | Topsoil TEB                             | NO                    | cmol /kg |
| T_CaCO3  | Topsoil Calcium Carbonate               | NO                    | % weight |
| T_CaSO4  | Topsoil Gypsum                          | NO                    | % weight |
| T_ESP    | Topsoil sodicity(ESP)                   | NO                    | %        |
| T_ECE    | Topsoil salinity(Elco)                  | YES                   | dS/m     |

Figure S1. Environmental variables related to the distribution of *Tagetes minuta* L.

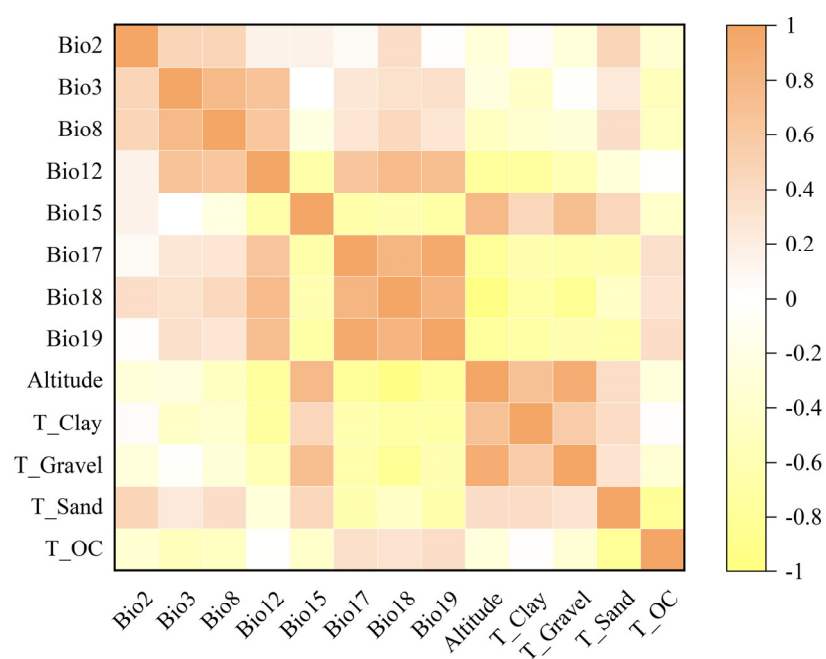

Figure S2. Correlation coefficient between Environmental variables.
